# Supplementary material
Source: MDPI journal article supplement (https://www.mdpi.com/2073-4395/10/12/1967)
Supplement: s1 [file s1]

(a) Goodness of fit diagnostic for ERGM-WTN (2009-2013)

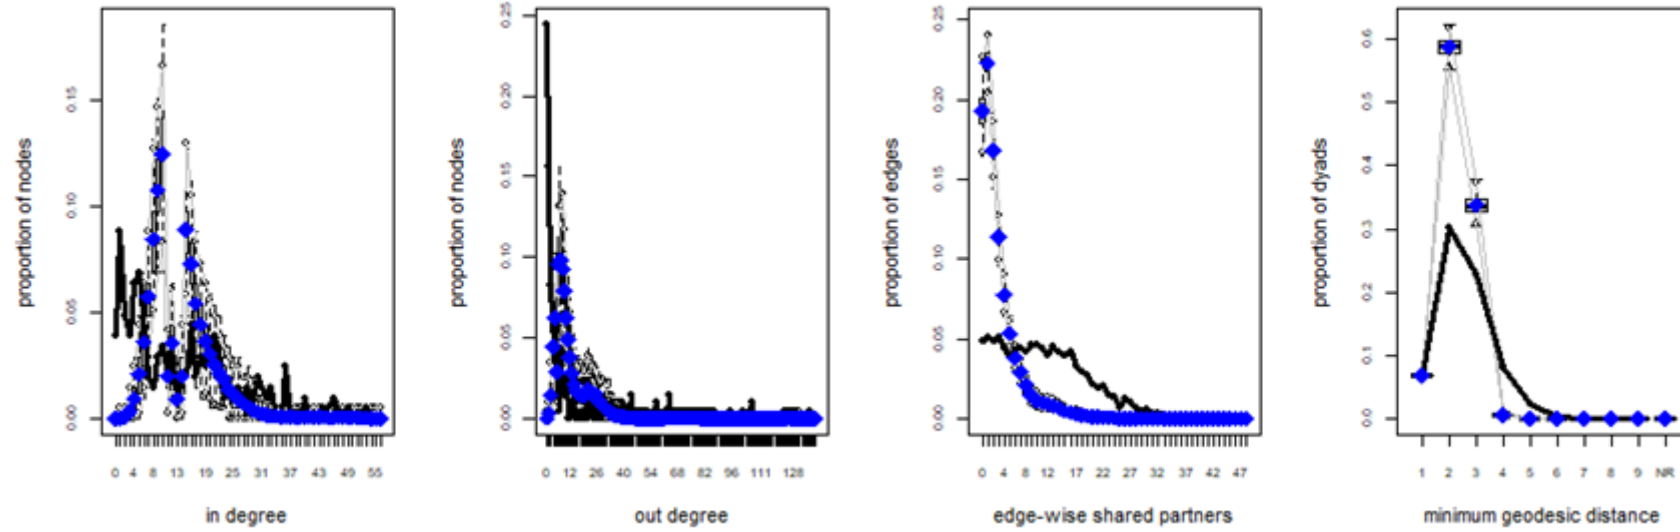

(b) Goodness of fit diagnostic for ERGM-WTN (2014-2018)

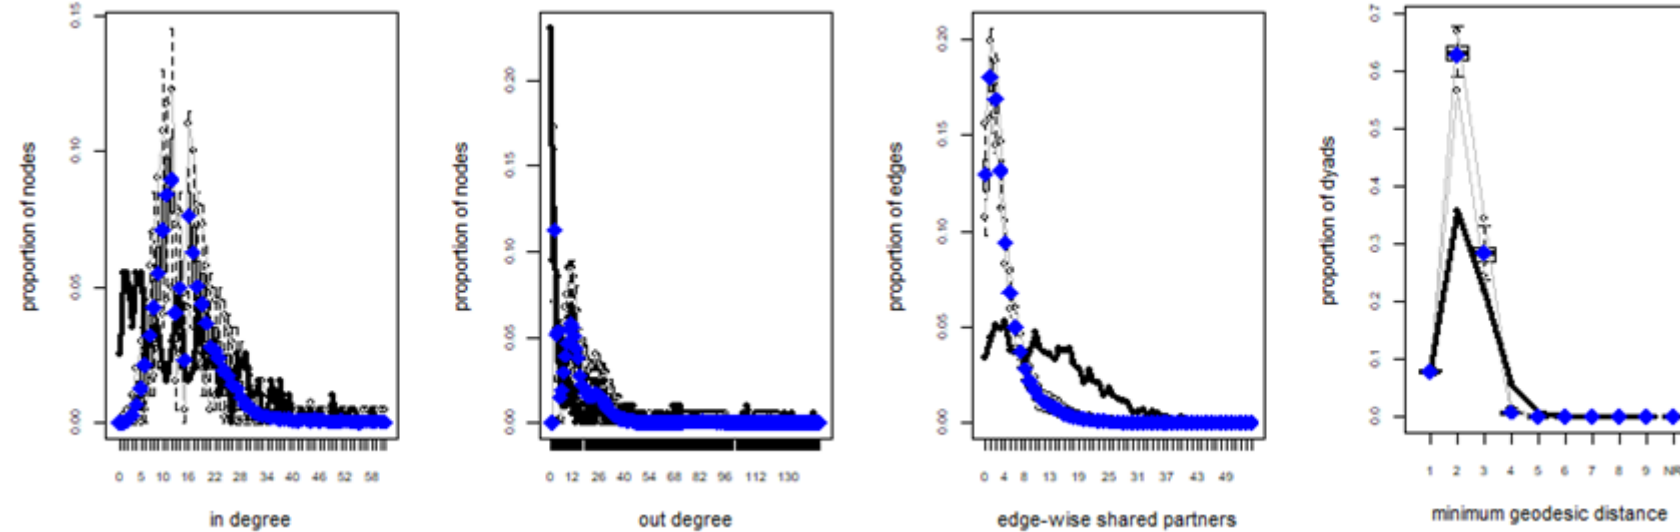

**Figure S1.** Goodness of fit diagnostics for ERGM-WTN (2009-2013) and ERGM-WTN (2014-2018). (a) Goodness of fit diagnostic for ERGM-WTN (2009-2013); (b) Goodness of fit diagnostic for ERGM-WTN (2014-2018).

Notes: The solid black lines depict the observed networks statistics from the dataset, the dashed lines depict 95% simulation intervals under the estimated model and the box-and-whiskers indicate the model data obtained from the 100 simulations of the proposed network ( the blue dots represent the median).
